# Supplementary material for: Optimization of the Chronic Kidney Disease–Peritoneal Dialysis App to Improve Care for Patients on Peritoneal Dialysis in Northeast Thailand: User-Centered Design Study
Source: PubMed Central journal article supplement (PMC9301552; doi:10.2196/37291), 2022-07-06

## Multimedia Appendix 1: CKD-PD app Screenshots

1. CKD-PD mobile application “CKD รักษาไต”

is available for free download in both Android and iOS format. There is also a CKD app for individuals that are not on peritoneal dialysis but want to track their own renal status, blood pressure, and diet. It is not monitored through the PD clinic

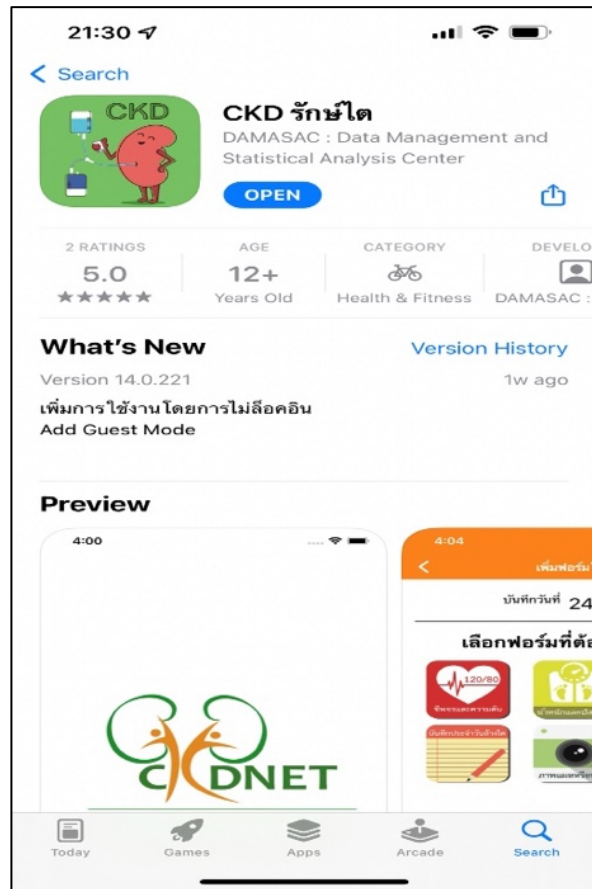

2. Patients are enrolled in the CKD-PD monitoring system through the PD clinic. PD nurses provide a user name and password. Once enrolled, their hydration metrics can be uploaded to the CKDNET data base on the Thai Care Cloud. This allows the PD clinic staff to monitor their hydration metrics from the PD clinic.

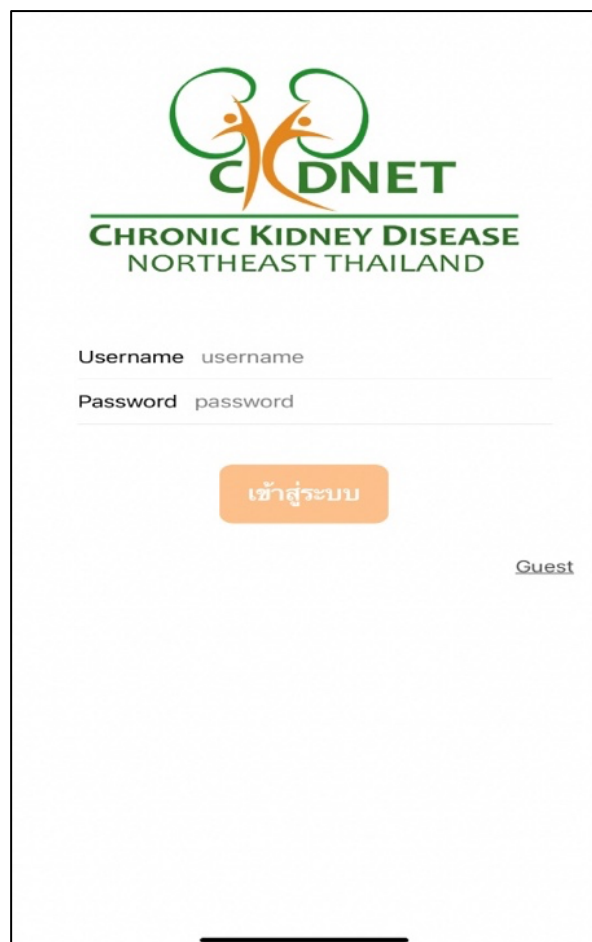

3. The home screen has patient demographics and hydration metric data. New hydration metric data can be added by using the “+” key.

The information displayed includes

- Patients identification
- Patient’s daily hydration matrix data
  - Peritoneal dialysis fluid (PDF) instilled and drained for each cycle
  - Body weight
  - Blood pressure and heart rate
  - Fluid intake
  - Urine volume

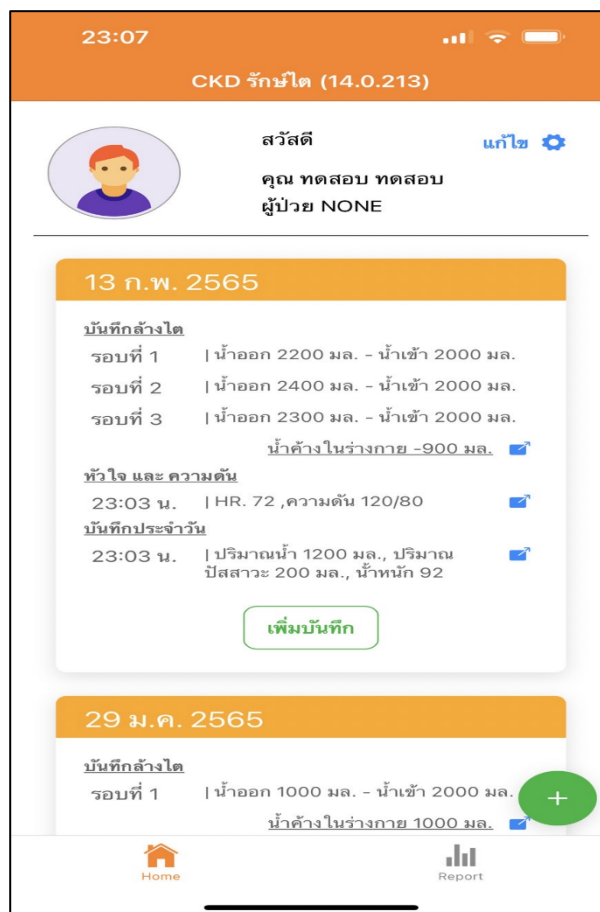

4. Patients can view and record each hydration metric separately.

- Blood pressure and heart rate
- Body weight, fluid intake and urine
- Blood sugar level
- PDF instilled and drained volume

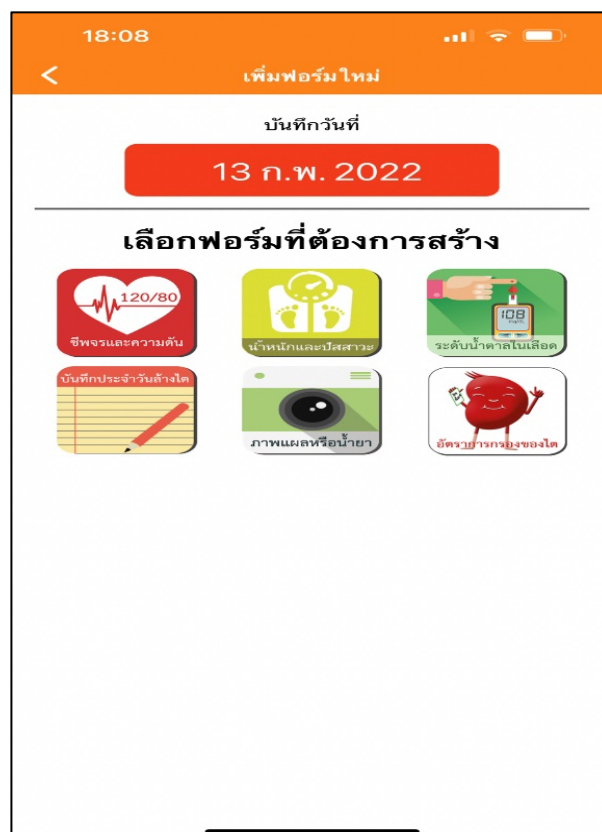

4.1 Blood pressure and heart rate are entered on the same screen. Data entry can be done by typing or voice recognition.

The screenshot shows a mobile application interface with an orange header. The time is 18:08. The title is 'ซีพจร ความดัน'. Below the header, it displays 'บันทึกวันที่ 13 ก.พ. 2022' and 'เวลาของบันทึก 18:07 น.'. The main content area has three rows of input fields, each with a dropdown menu set to 'แตะ' and a microphone icon to the right. The rows are: 'ความดันตัวบน (ครั้งต่อนาที)', 'ความดันตัวล่าง (ครั้งต่อนาที)', and 'อัตราการเต้นของหัวใจ (ครั้งต่อนาที)'. At the bottom, there is a green button labeled 'บันทึก'.

4.2 Body weight, height, fluid intake and urine volume are recorded on a separate screen. Manual and voice data entry are available.

The screenshot shows a mobile application interface with an orange header. The time is 18:08. The title is 'บันทึกประจำวัน'. Below the header, it displays 'บันทึกวันที่ 13 ก.พ. 2022' and 'เวลาของบันทึก 18:08 น.'. The main content area is divided into two sections. The first section, 'ร่างกาย', has five rows of input fields, each with a dropdown menu set to 'แตะ' and a microphone icon to the right. The rows are: 'ส่วนสูง (ซม.)' with the value '174', 'น้ำหนัก (กิโลกรัม)', 'รอบเอว (ซม.)', 'ปริมาณน้ำดื่ม (มล.)', and 'ปริมาณปัสสาวะ (มล.)'. The second section, 'การสูบบุหรี่', has three radio button options: 'ไม่เคยสูบ' (which is selected with a green checkmark), 'เคยสูบ', and 'ยังสูบ'. At the bottom, there is a green button labeled 'บันทึก'.

4.3 The peritoneal fluid volumes instilled and drained are recorded on the next screen. In addition to fluid volume, time of instillation and drainage and cycle time are recorded. There are manual and voice data entry options.

PD patients do multiple cycles each day”+” icon for the next cycle. At the end of the 24 hour period, the total fluid volume removed or ultrafiltration volume is automatically calculated by using the arrow icon.



18:09

เพิ่มรอบล้างไต

Back

### ปริมาณน้ำยา

1.5%    2.5%    4.25%    7.5%ICO

#### รอบเวลาน้ำออก

|                                                   |                                                                                          |
|---------------------------------------------------|------------------------------------------------------------------------------------------|
| เวลาเริ่ม<br><a href="#">(แตะเพื่อใช้เวลานี้)</a> | 18:08 น.                                                                                 |
| เวลาเสร็จ<br><a href="#">(แตะเพื่อใช้เวลานี้)</a> | 18:15 น.                                                                                 |
| ปริมาณน้ำออก<br>(มล.)                             | 2200  |

---

#### รอบเวลาน้ำเข้า

|                                                   |                                                                                           |
|---------------------------------------------------|-------------------------------------------------------------------------------------------|
| เวลาเริ่ม<br><a href="#">(แตะเพื่อใช้เวลานี้)</a> | 18:15 น.                                                                                  |
| เวลาเสร็จ<br><a href="#">(แตะเพื่อใช้เวลานี้)</a> | 18:25 น.                                                                                  |
| ปริมาณน้ำเข้า<br>(มล.)                            | 2000  |

[บันทึก](#)

5. Patients can monitor their hydration metrics over a 2 week period using the report function screens. There are control charts showing the acceptable ranges that have been personalized by the nephrologists for each patient. Patient can monitor their hydration metrics at home and contact the PD clinic if they are out of range.

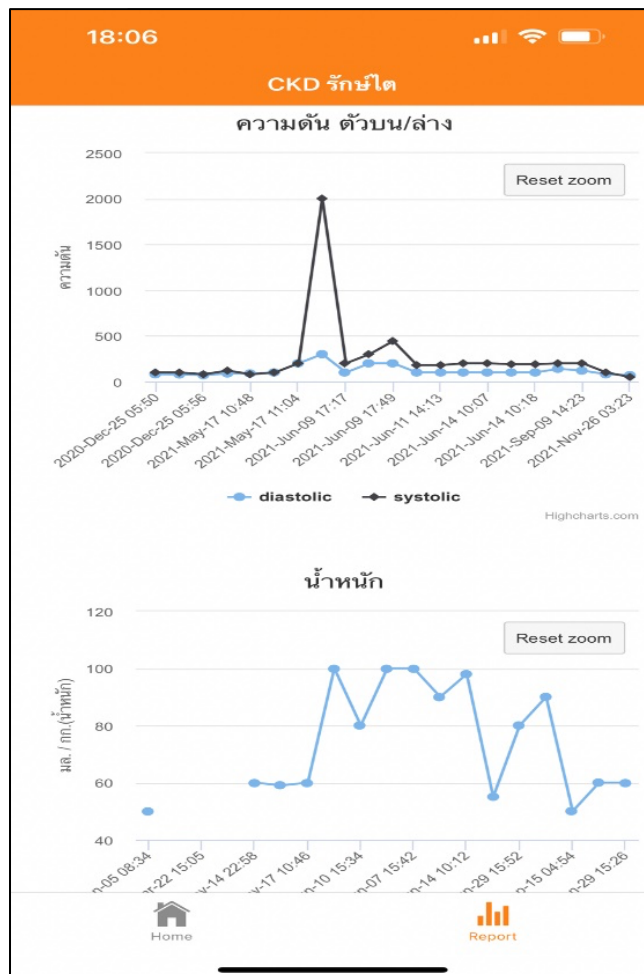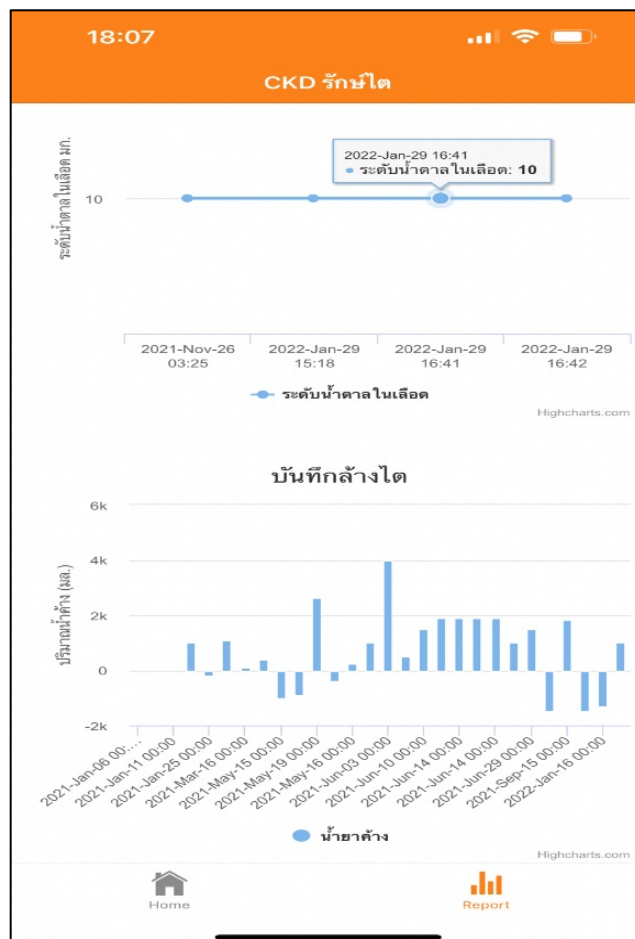

Supplement: formative_v6i7e37291_app1.pdf [file formative_v6i7e37291_app1.pdf]
