# Supplementary material for: Optimization of the Chronic Kidney Disease–Peritoneal Dialysis App to Improve Care for Patients on Peritoneal Dialysis in Northeast Thailand: User-Centered Design Study
Source: PubMed Central journal article supplement (PMC9301552; doi:10.2196/37291), 2022-07-06
Supplement: formative_v6i7e37291_app4.pdf [file formative_v6i7e37291_app4.pdf]

**Multimedia Appendix 4: Participant Observation Guide**

| Task/feature                   | Prompt 1                                    | Prompt 2                                       | <sup>a</sup> Rating | <sup>b</sup> Observations |
|--------------------------------|---------------------------------------------|------------------------------------------------|---------------------|---------------------------|
|                                | What do you <b>like</b> about this feature? | What do you <b>dislike</b> about this feature? |                     |                           |
| Opening and accessing screens  |                                             |                                                |                     |                           |
| Entering daily body weight     |                                             |                                                |                     |                           |
| Entering blood pressure        |                                             |                                                |                     |                           |
| Entering dialysate volume      |                                             |                                                |                     |                           |
| Viewing hydration metrics      |                                             |                                                |                     |                           |
| Interpreting hydration metrics |                                             |                                                |                     |                           |
| Communication with PD clinic   |                                             |                                                |                     |                           |
| User incentives                |                                             |                                                |                     |                           |

<sup>a</sup> Rating: 1=Good, 2=Neutral, 3=Not good

<sup>b</sup> Observations by research assistant while participant is performing task
