# Supplementary material for: Optimization of the Chronic Kidney Disease–Peritoneal Dialysis App to Improve Care for Patients on Peritoneal Dialysis in Northeast Thailand: User-Centered Design Study
Source: PubMed Central journal article supplement (PMC9301552; doi:10.2196/37291), 2022-07-06
Supplement: formative_v6i7e37291_app5.pdf [file formative_v6i7e37291_app5.pdf]

**Multimedia Appendix 5: UTAUT Scores<sup>a</sup> by Participant and Domain Between Phase 1 and 3, or Between Phase 2 and 3**

| <b>Group 1</b>           | <b>Participant 1</b> |    |                   |    |    |      |                       | <b>Participant 2</b> |    |      |    |    |      |          | <b>Participant 3</b> |    |      |    |    |      |          | <b>Participant 4</b> |    |      |    |    |      |          | <b>Participant 5</b>  |    |      |    |    |      |          |                        |
|--------------------------|----------------------|----|-------------------|----|----|------|-----------------------|----------------------|----|------|----|----|------|----------|----------------------|----|------|----|----|------|----------|----------------------|----|------|----|----|------|----------|-----------------------|----|------|----|----|------|----------|------------------------|
| <b>Phase #</b>           | 1                    |    |                   | 3  |    |      |                       | 1                    |    |      | 3  |    |      |          | 1                    |    |      | 3  |    |      |          | 1                    |    |      | 3  |    |      |          |                       |    |      |    |    |      |          |                        |
| <b>Week #</b>            | 0                    | 3  | Diff <sup>b</sup> | 16 | 20 | Diff | Tot diff <sup>c</sup> | 0                    | 3  | Diff | 16 | 20 | Diff | Tot diff | 0                    | 3  | Diff | 16 | 20 | Diff | Tot diff | 0                    | 3  | Diff | 16 | 20 | Diff | Tot diff | 0                     | 3  | Diff | 16 | 20 | Diff | Tot diff | Mean diff <sup>d</sup> |
| Performance expectancy   | 15                   | 15 | 0                 | 14 | 13 | -1   | -2                    | 9                    | 13 | 4    | 12 | 12 | 0    | 3        | 14                   | 13 | -1   | 15 | 15 | 0    | 1        | 11                   | 13 | 2    | 13 | 12 | -1   | 1        | 14                    | 14 | 0    | 14 | 13 | -1   | -1       | 0.4                    |
| Effort expectancy        | 14                   | 15 | 1                 | 12 | 12 | 0    | -2                    | 11                   | 12 | 1    | 12 | 15 | 3    | 4        | 14                   | 14 | 0    | 15 | 15 | 0    | 1        | 14                   | 14 | 0    | 12 | 13 | 1    | -1       | 14                    | 14 | 0    | 14 | 15 | 1    | 1        | 0.6                    |
| Social Influence         | 15                   | 14 | -1                | 13 | 12 | -1   | -3                    | 10                   | 11 | 1    | 11 | 13 | 2    | 3        | 14                   | 13 | -1   | 14 | 15 | 1    | 1        | 13                   | 3  | -10  | 14 | 13 | -1   | 0        | 15                    | 15 | 0    | 15 | 13 | -2   | -2       | -0.4                   |
| Voluntariness            | 15                   | 9  | -6                | 12 | 12 | 0    | -3                    | 9                    | 12 | 3    | 7  | 6  | -1   | -3       | 14                   | 9  | -5   | 13 | 9  | -4   | -5       | 15                   | 15 | 0    | 12 | 13 | 1    | -2       | 15                    | 15 | 0    | 15 | 12 | -3   | -3       | -3.0                   |
| Intention to use         | 15                   | 15 | 0                 | 15 | 13 | -2   | -2                    | 12                   | 12 | 0    | 15 | 15 | 0    | 3        | 15                   | 15 | 0    | 15 | 11 | -4   | -4       | 15                   | 15 | 0    | 14 | 11 | -3   | -4       | 15                    | 15 | 0    | 15 | 9  | -6   | -6       | -2.6                   |
| Facilitating conditions  | 15                   | 15 | 0                 | 13 | 12 | -1   | -3                    | 12                   | 12 | 0    | 13 | 15 | 2    | 3        | 15                   | 13 | -2   | 13 | 15 | 2    | 0        | 13                   | 13 | 0    | 13 | 12 | -1   | -1       | 14                    | 15 | 1    | 14 | 15 | 1    | 1        | 0                      |
| Total score <sup>e</sup> | 89                   | 83 | -6                | 79 | 74 | -5   | -15                   | 63                   | 72 | 9    | 70 | 76 | 6    | 13       | 86                   | 77 | -9   | 85 | 80 | -5   | -6       | 81                   | 73 | -8   | 78 | 74 | -4   | -7       | 87                    | 88 | 1    | 87 | 77 | -10  | -10      | 1                      |
| <b>Group 2</b>           | <b>Participant 6</b> |    |                   |    |    |      |                       | <b>Participant 7</b> |    |      |    |    |      |          | <b>Participant 8</b> |    |      |    |    |      |          | <b>Participant 9</b> |    |      |    |    |      |          | <b>Participant 10</b> |    |      |    |    |      |          |                        |
| <b>Phase #</b>           | 2                    |    |                   | 3  |    |      |                       | 2                    |    |      | 3  |    |      |          | 2                    |    |      | 3  |    |      |          | 2                    |    |      | 3  |    |      |          | 1                     |    |      | 3  |    |      |          |                        |
| <b>Week #</b>            | 8                    | 12 | Diff              | 16 | 20 | Diff | Tot diff              | 8                    | 12 | Diff | 16 | 20 | Diff | Tot diff | 8                    | 12 | Diff | 16 | 20 | Diff | Tot diff | 8                    | 12 | Diff | 16 | 20 | Diff | Tot diff | 8                     | 12 | Diff | 16 | 20 | Diff | Tot diff | Mean diff              |
| Performance expectancy   | 13                   | 13 | 0                 | 13 | 12 | -1   | -1                    | 12                   | 11 | -1   | NA | NA | NA   | NA       | 13                   | 14 | 1    | 14 | 14 | 0    | 1        | 12                   | 10 | -2   | 13 | 13 | 0    | 1        | 13                    | 13 | 0    | 14 | 13 | -1   | 0        | 0.25                   |
| Effort expectancy        | 13                   | 12 | -1                | 13 | 12 | -1   | -1                    | 12                   | 12 | 0    | NA | NA | NA   | NA       | 12                   | 13 | 1    | 13 | 12 | -1   | 0        | 15                   | 15 | 0    | 14 | 15 | 1    | 0        | 12                    | 14 | 2    | 13 | 13 | 0    | 1        | 0.5                    |
| Social Influence         | 13                   | 13 | 0                 | 12 | 12 | 0    | -1                    | 11                   | 13 | 2    | NA | NA | NA   | NA       | 14                   | 14 | 0    | 15 | 13 | -2   | -1       | 12                   | 14 | 2    | 13 | 13 | 0    | 1        | 13                    | 14 | 1    | 13 | 12 | -1   | -1       | -0.5                   |
| Voluntariness            | 14                   | 11 | -3                | 15 | 11 | -4   | -3                    | 11                   | 12 | 1    | NA | NA | NA   | NA       | 12                   | 11 | -1   | 9  | 14 | 5    | 2        | 9                    | 12 | 3    | 12 | 12 | 0    | 3        | 13                    | 13 | 0    | 12 | 9  | -3   | -4       | -0.5                   |
| Intention to use         | 13                   | 12 | -1                | 14 | 13 | -1   | 0                     | 8                    | 12 | 4    | NA | NA | NA   | NA       | 12                   | 14 | 2    | 14 | 14 | 0    | 2        | 9                    | 10 | 1    | 14 | 12 | -2   | 3        | 13                    | 14 | 1    | 14 | 13 | -1   | 0        | 1.25                   |
| Facilitating conditions  | 13                   | 12 | -1                | 14 | 12 | -2   | -1                    | 12                   | 12 | 0    | NA | NA | NA   | NA       | 12                   | 12 | 0    | 14 | 13 | -1   | 1        | 14                   | 13 | -1   | 14 | 14 | 0    | 0        | 13                    | 13 | 0    | 12 | 12 | 0    | -1       | -0.25                  |
| Total score              | 79                   | 73 | -6                | 81 | 72 | -9   | -7                    | 66                   | 72 | 6    | NA | NA | NA   | NA       | 75                   | 78 | 3    | 79 | 80 | 1    | 5        | 71                   | 74 | 3    | 80 | 79 | -1   | 8        | 77                    | 81 | 4    | 78 | 72 | -6   | -5       | 0.25                   |

<sup>a</sup>UTAUT scale: Score for individual questions 1 (strongly disagree) – 5 (strongly agree). Each domain has 3 questions; domain score ranges from 5-15. Total score for all 6 domains range from 30 – 90

<sup>b</sup>Diff: difference between beginning and end of phase 1 or phase 2

<sup>c</sup>Tot diff: difference between beginning of phase 1 or 2 and phase 3

<sup>d</sup>Mean diff: average of total difference of all participants in each group by domain

<sup>e</sup>Total score: UTAUT score for all 6 domains for individual participants

<sup>f</sup>NA: participant 7 expires prior to phase 3
