# Supplementary material for: Optimization of the Chronic Kidney Disease–Peritoneal Dialysis App to Improve Care for Patients on Peritoneal Dialysis in Northeast Thailand: User-Centered Design Study
Source: PubMed Central journal article supplement (PMC9301552; doi:10.2196/37291), 2022-07-06
Supplement: formative_v6i7e37291_app6.pdf [file formative_v6i7e37291_app6.pdf]

## Multimedia Appendix 6: Summary of Participant Observation Phases 1, 2 and 3

| Task                                        | Open screens                                                | Enter body weight with NFC                                                                                                                                                                                                                 | Enter Blood Pressure                                                                                                                                                                                        | Enter Dialysate                                                                                                                                                                | View hydration metrics                                                                                                                                                                                                                                                                                                                                  | Interpret hydration metrics                                                                                                                                                                                              | Clinic communication                                                                              | User incentives                                                                                                      |
|---------------------------------------------|-------------------------------------------------------------|--------------------------------------------------------------------------------------------------------------------------------------------------------------------------------------------------------------------------------------------|-------------------------------------------------------------------------------------------------------------------------------------------------------------------------------------------------------------|--------------------------------------------------------------------------------------------------------------------------------------------------------------------------------|---------------------------------------------------------------------------------------------------------------------------------------------------------------------------------------------------------------------------------------------------------------------------------------------------------------------------------------------------------|--------------------------------------------------------------------------------------------------------------------------------------------------------------------------------------------------------------------------|---------------------------------------------------------------------------------------------------|----------------------------------------------------------------------------------------------------------------------|
| <b>Phase 1</b>                              |                                                             |                                                                                                                                                                                                                                            |                                                                                                                                                                                                             |                                                                                                                                                                                |                                                                                                                                                                                                                                                                                                                                                         |                                                                                                                                                                                                                          |                                                                                                   |                                                                                                                      |
| Liked                                       | easy, not complicated                                       | -data automatically entered                                                                                                                                                                                                                | -data automatically entered                                                                                                                                                                                 | -data automatically entered                                                                                                                                                    | - previous data for BP, UF displayed on the main page                                                                                                                                                                                                                                                                                                   | <u>Manual</u><br>- outlier alert of BW (compared to DW), BP                                                                                                                                                              | -easy to contact via LINE and telephone                                                           | - data in one place<br>- communicates data to the PD team<br>- manual entry helpful if problem with NFC              |
| Disliked                                    | -app opens slowly<br>-app sometimes unstable                | - data not displayed on the weight scale<br>- no alert indicating the device is ready to use<br>- long time to transfer data from card<br>- hard to use hold card in position<br>- inaccurate scales<br>- requires too many steps          | - unreadable/<br>inaccurate if numbers and rows of the BP machine are not the same size or low light<br>- have reading does not match actual value sometimes                                                | - same issues as entering daily body weight<br>- not distinguish between CAPD and APD PD systems                                                                               | - previous hydration metrics not included<br>- every dialysate volume cycle reported as cycle 1, so UF for each cycle calculated for entire day<br>- slow to load program<br>- no home button to navigate back to the main page<br>- restart required to view previous data<br>- graph does not show hydration, dialysis fluid data<br>- font too small | <u>NFC</u><br>- no interpretation and alert for BW, BP, dialysate volume, BMI<br><u>Manual</u><br>- no interpretation of net dialysate gain/loss<br>- no BMI interpretation                                              | - did not receive an instant reply via LINE from PD clinic                                        | - no feedback or reminders for patients to send data<br>- app is sometimes unstable<br>- can't use app in iOS system |
| Feature rating <sup>a</sup><br>mean (range) | <b>1.07 (1-2)</b>                                           | <b>1.07 (1-2)</b>                                                                                                                                                                                                                          | <b>1.07 (1-2)</b>                                                                                                                                                                                           | <b>1.14 (1-2)</b>                                                                                                                                                              | <b>1.29 (1-2)</b>                                                                                                                                                                                                                                                                                                                                       | <b>1.07 (1-2)</b>                                                                                                                                                                                                        | <b>1 (1)</b>                                                                                      | <b>1.07 (1-2)</b>                                                                                                    |
| <b>Phase 2</b>                              |                                                             |                                                                                                                                                                                                                                            |                                                                                                                                                                                                             |                                                                                                                                                                                |                                                                                                                                                                                                                                                                                                                                                         |                                                                                                                                                                                                                          |                                                                                                   |                                                                                                                      |
| Liked                                       | easy, automatic login, clear, multifunction, optimal detail | easy, data linked automatically, more detailed value (with a decimal point)                                                                                                                                                                | - easy to do<br>- data linked automatically                                                                                                                                                                 | - easy to do<br>-data linked automatically                                                                                                                                     | historical data for BP, PR, dialysate volume displayed on the main page                                                                                                                                                                                                                                                                                 | <u>Manual</u><br>- interpretation and alert of BMI, PR and BP<br>- can adjust selfcare                                                                                                                                   | - easy to contact via LINE or telephone or in-person<br>- can consult on various issues           | - easy, fast<br>- save data in one place<br>- communicate data to the treatment team                                 |
| Disliked                                    | -takes a long time to open<br>-need to open multiple pages  | - data not displayed on the weight scale<br>- no alert indicating that device is ready<br>- takes a long time for information to transfer while touching the card<br>- too many steps<br>- require multiple devices<br>- inaccurate scales | - unreadable/<br>inaccurate in low light or if screen has other numbers<br>- must repeat because the numbers do not always match the actual value<br>- no memory in device so need to take photos each time | -same as entering daily body weight<br>- can only edit data<br>-inflow and outflow times not recorded<br>- can't use in APD<br>- cycles after midnight counted in the next day | -no previous data for BW, BMI and fluid intake included<br>- hard to read, not displayed as table<br>- dialysate volume: combined cycles for CAPD<br>- graphical sometimes incomplete (no UF)<br>- graph scale incorrect                                                                                                                                | <u>NFC</u><br>- no interpretation and alert of BW, PR, BP, dialysate volume, BMI<br><u>Manual</u><br>- no comparison BW to and UF<br>- interpretation not on same page<br>- no alert with sound, different color or font | none                                                                                              | none                                                                                                                 |
| Feature rating <sup>a</sup><br>mean (range) | <b>1 (1)</b>                                                | <b>1.2 (1-2)</b>                                                                                                                                                                                                                           | <b>1.6 (1-3)</b>                                                                                                                                                                                            | <b>1.2 (1-2)</b>                                                                                                                                                               | <b>1 (1)</b>                                                                                                                                                                                                                                                                                                                                            | <b>1.2 (1-2)</b>                                                                                                                                                                                                         | <b>1(1)</b>                                                                                       | <b>1.2 (1-2)</b>                                                                                                     |
| <b>Phase 3: CKD-PD app</b>                  |                                                             |                                                                                                                                                                                                                                            |                                                                                                                                                                                                             |                                                                                                                                                                                |                                                                                                                                                                                                                                                                                                                                                         |                                                                                                                                                                                                                          |                                                                                                   |                                                                                                                      |
| Liked                                       | -easy<br>-automatic login                                   | - easy<br>- convenient                                                                                                                                                                                                                     | - easy to enter<br>- easy to fill out<br>- editable<br>- photo is easy to use<br>- easy to use manual                                                                                                       | - easy<br>- automatically calculate<br>- editable                                                                                                                              | -previous data for BP, PR, dialysate volume displayed on the main page<br>-can see anytime                                                                                                                                                                                                                                                              | - interpretation and alert of BW, BMI, BP<br>- know how health is<br>- know what to do next<br>- can adjust selfcare                                                                                                     | - easy to contact via LINE or telephone or in-person<br>- a group line<br>-easy to consult clinic | - convenient<br>- easy to carry<br>- data saved together<br>- selfcare planning<br>- faster way to                   |

|                                             |                                                                                                                                |                                                                                                                       |                                                                                                                              |                                                                                                                                                                                                                                   |                                                                                                                                                                                                    |                                                                                                                   |                                                                                                                                   |                                                                                                                                                                             |
|---------------------------------------------|--------------------------------------------------------------------------------------------------------------------------------|-----------------------------------------------------------------------------------------------------------------------|------------------------------------------------------------------------------------------------------------------------------|-----------------------------------------------------------------------------------------------------------------------------------------------------------------------------------------------------------------------------------|----------------------------------------------------------------------------------------------------------------------------------------------------------------------------------------------------|-------------------------------------------------------------------------------------------------------------------|-----------------------------------------------------------------------------------------------------------------------------------|-----------------------------------------------------------------------------------------------------------------------------------------------------------------------------|
|                                             |                                                                                                                                |                                                                                                                       |                                                                                                                              |                                                                                                                                                                                                                                   | - can compare with previous readings<br>-easy to read<br>-can see in one place                                                                                                                     | - good and instant result update                                                                                  |                                                                                                                                   | communicate data to the treatment team<br>- solve problems instantly, may not need to visit hospital                                                                        |
| Disliked                                    | -take a long time to open especially body weight icon<br>-app freezes often, must close and reopen it<br>-bounce off by itself | <u>Manual</u><br>-take a long time to open<br><u>NFC</u><br>- take a long time<br>-multiple steps<br>-inaccurate data | - taking photo takes longer than manual entry<br>- difficult to take photo<br>- the numbers are incomplete when taking photo | <u>Manual</u><br>- too many fields<br>- app freezes; must close and reopen<br>- option to adjust time<br>- separate APD & CAPD<br>- not calculating UF<br>- can't delete data<br><u>NFC</u><br>-multiple steps                    | none                                                                                                                                                                                               | - confusing -BMI is interpreted as being overweight. But in the results of the weight interprets as normal weight | none                                                                                                                              | -need good internet signal<br>-unstable<br>-app freezes often                                                                                                               |
| Feature rating <sup>a</sup><br>mean (range) | <b>1.6 (1-3)</b>                                                                                                               | <b>Manual</b><br><b>1.1 (1-2)</b><br><b>NFC</b><br><b>2.3 (1-3)</b>                                                   | <b>1.1 (1-2)</b>                                                                                                             | <b>Manual</b><br><b>1.1 (1-2)</b><br><b>NFC</b><br><b>2.3 (1-3)</b>                                                                                                                                                               | <b>1.1 (1-2)</b>                                                                                                                                                                                   | <b>1.1 (1-2)</b>                                                                                                  | <b>1 (1)</b>                                                                                                                      | <b>1.2 (1-3)</b>                                                                                                                                                            |
| <b>Phase 3: Logbook</b>                     |                                                                                                                                |                                                                                                                       |                                                                                                                              |                                                                                                                                                                                                                                   |                                                                                                                                                                                                    |                                                                                                                   |                                                                                                                                   |                                                                                                                                                                             |
| Liked                                       | -NA                                                                                                                            | -easy                                                                                                                 | - easy<br>- can be inspected and edited                                                                                      | - easy<br>- there are clear fields to fill out                                                                                                                                                                                    | - can see historical data for BP, BW, UF with daily difference<br>-easy to read<br>-doctors can adjust treatment at clinic<br>-can adjust selfcare at home ex. salt restriction, adjust medication | NA                                                                                                                | - easy to contact via LINE, phone or in-person<br>- exchange opinions<br>- consult on various issues                              | - easy to see/read<br>- familiar with it<br>- keep as evidence and memory<br>- do not need internet/cellular<br>- can't be hacked<br>- some suggest using both book and app |
| Disliked                                    | -NA                                                                                                                            | - inconvenient when logbook not available or paper runs out<br>- small letters<br>- need to do                        | -inconvenient                                                                                                                | - inconvenient<br>- takes a long time<br>- need to calculate UF<br>- tables provided have unnecessary fields<br>- must record the start & stop times beginning & end of each cycle<br>- must separate cycles and days by yourself | - no interpretation<br>- difficult to read because of the large numbers and multiple fields                                                                                                        | NA                                                                                                                | -sometimes difficult to contact via telephone because phone is busy<br>-no private group in LINE<br>-have to wait at clinic visit | -inconvenient to carry<br>-want to stop using the book if there's an app that can replace the book<br>-some feel that it's redundant if using both book and app             |
| Feature rating <sup>a</sup><br>mean (range) | <b>NA</b>                                                                                                                      | <b>1.4 (1-2)</b>                                                                                                      | <b>1.4 (1-3)</b>                                                                                                             | <b>1.8 (1-3)</b>                                                                                                                                                                                                                  | <b>1.7 (1-3)</b>                                                                                                                                                                                   | <b>NA</b>                                                                                                         | <b>1.2 (1-3)</b>                                                                                                                  | <b>1.9 (1-3)</b>                                                                                                                                                            |

\*Feature rating scale: 1= Good, 2=Neutral, 3=Not good

Abbreviations:

BP- blood pressure

BW- body weight

DW- dry weight

DW- dry weight

NA – not applicable

NFC – Near Field Communication

UF- ultrafiltration volume
