# Supplementary material for: Optimization of the Chronic Kidney Disease–Peritoneal Dialysis App to Improve Care for Patients on Peritoneal Dialysis in Northeast Thailand: User-Centered Design Study
Source: PubMed Central journal article supplement (PMC9301552; doi:10.2196/37291), 2022-07-06
Supplement: formative_v6i7e37291_app7.pdf [file formative_v6i7e37291_app7.pdf]

## Multimedia Appendix 7: Detailed hydration metric completion results

| Participant                 | 1    | 2    | 3     | 4    | 5     | 6    | 7 <sup>d</sup> | 8    | 9     | 10    |
|-----------------------------|------|------|-------|------|-------|------|----------------|------|-------|-------|
| <b>Phase 1<sup>a</sup></b>  |      |      |       |      |       |      |                |      |       |       |
| <b>BW<sup>e</sup> N</b>     | 14   | 11   | 14    | 14   | 12    | -    | -              | -    | -     | -     |
| <b>BW done</b>              | 12   | 8    | 14    | 7    | 12    |      |                |      |       |       |
| <b>BW%</b>                  | 85.7 | 72.7 | 100   | 50   | 100   | -    | -              | -    | -     | -     |
| <b>BP<sup>f</sup> N</b>     | 14   | 11   | 14    | 14   | 12    | -    | -              | -    | -     | -     |
| <b>BP done</b>              | 14   | 10   | 14    | 14   | 12    |      |                |      |       |       |
| <b>BP %</b>                 | 100  | 90.9 | 100   | 100  | 100   | -    | -              | -    | -     | -     |
| <b>UF<sup>g</sup> N</b>     | 56   | 44   | 14    | 56   | 24    | -    | -              | -    | -     | -     |
| <b>UF done</b>              | 54   | 21   | 14    | 52   | 24    |      |                |      |       |       |
| <b>UF%</b>                  | 96.4 | 47.7 | 100   | 92.9 | 100   | -    | -              | -    | -     | -     |
| <b>All HM<sup>h</sup> N</b> | 84   | 66   | 42    | 84   | 48    | -    | -              | -    | -     | -     |
| <b>All HM done</b>          | 80   | 39   | 42    | 73   | 48    |      |                |      |       |       |
| <b>All HM %</b>             | 95.2 | 59.1 | 100   | 86.9 | 100   | -    | -              | -    | -     | -     |
|                             |      |      |       |      |       |      |                |      |       |       |
| <b>Phase 2<sup>b</sup></b>  |      |      |       |      |       |      |                |      |       |       |
| <b>BW N</b>                 | -    | -    | -     | -    | -     | 14   | 13             | 14   | 7     | 10    |
| <b>BW done</b>              |      |      |       |      |       | 13   | 12             | 14   | 0     | 9     |
| <b>BW%</b>                  | -    | -    | -     | -    | -     | 92.9 | 92.3           | 100  | 0     | 90    |
| <b>BP N</b>                 | -    | -    | -     | -    | -     | 14   | 13             | 14   | 7     | 10    |
| <b>BP done</b>              |      |      |       |      |       | 14   | 11             | 14   | 0     | 10    |
| <b>BP %</b>                 | -    | -    | -     | -    | -     | 100  | 84.6           | 100  | 0     | 100   |
| <b>UF N</b>                 | -    | -    | -     | -    | -     | 14   | 13             | 14   | 28    | 10    |
| <b>UF done</b>              |      |      |       |      |       | 11   | 12             | 9    | 24    | 8     |
| <b>UF%</b>                  | -    | -    | -     | -    | -     | 85.7 | 90             | 76   | 69.6  | 76.5  |
| <b>All HM N</b>             | -    | -    | -     | -    | -     | 42   | 39             | 42   | 30    | 80    |
| <b>All HM done</b>          |      |      |       |      |       | 38   | 35             | 37   | 24    | 27    |
| <b>All HM %</b>             | -    | -    | -     | -    | -     | 90.5 | 89.7           | 88.1 | 57.1  | 90    |
|                             |      |      |       |      |       |      |                |      |       |       |
| <b>Phase 3<sup>c</sup></b>  |      |      |       |      |       |      |                |      |       |       |
| <b>BW N</b>                 | 7    | 14   | 14    | 14   | 14    | 14   | ND             | 14   | 14    | 14    |
| <b>BW done</b>              | 0    | 0    | 3     | 12   | 10    | 14   | ND             | 14   | 1     | 11    |
| <b>BW%</b>                  | 0    | 0    | 21.4  | 85.7 | 71.4  | 100  | ND             | 100  | 7.1   | 78.6  |
| <b>BP N</b>                 | 7    | 14   | 14    | 14   | 14    | 14   | ND             | 14   | 14    | 14    |
| <b>BP done</b>              | 7    | 10   | 11    | 11   | 12    | 14   | ND             | 14   | 0     | 11    |
| <b>BP %</b>                 | 100  | 71.4 | 78.6  | 78.6 | 85.7  | 100  | ND             | 100  | 0     | 78.6  |
| <b>UF N</b>                 | 28   | 56   | 14    | 56   | 28    | 14   | ND             | 14   | 56    | 14    |
| <b>UF done</b>              | 12   | 32   | 12    | 56   | 18    | 14   | ND             | 11   | 14    |       |
| <b>UF%</b>                  | 42.9 | 57.1 | 85.7  | 100  | 64.3  | 100  | ND             | 78.6 | 25    | 78.6  |
| <b>All HM N</b>             | 42   | 84   | 42    | 84   | 56    | 42   | ND             | 42   | 84    | 42    |
| <b>All HM done</b>          | 19   | 42   | 26    | 79   | 40    | 42   | ND             | 39   | 15    | 33    |
| <b>All HM %</b>             | 45.2 | 50   | 61.9  | 94.0 | 71.4  | 100  | ND             | 92.9 | 17.9  | 68    |
|                             |      |      |       |      |       |      |                |      |       |       |
| <b>Difference</b>           | -50  | -9.1 | -38.1 | 7.1  | -28.6 | 9.5  | ND             | 4.8  | -39.2 | -11.4 |

<sup>a</sup> Phase 1: participants 1-5

<sup>b</sup> Phase 2: participants 6-10

<sup>c</sup> Phase 3: participants 1-10

<sup>d</sup> Participant 7 expired before completion of study

<sup>e</sup> BW: body weight

<sup>f</sup> BP: blood pressure

<sup>g</sup> UF: ultrafiltration – volume of fluid removed in 24 hours

<sup>h</sup> HM: Total # of hydration metrics (BW, BP, UF) required for observation period

<sup>o</sup> % of required hydration metrics (BW, BP UF) for observation period completed
