# Supplementary material for: Optimization of the Chronic Kidney Disease–Peritoneal Dialysis App to Improve Care for Patients on Peritoneal Dialysis in Northeast Thailand: User-Centered Design Study
Source: PubMed Central journal article supplement (PMC9301552; doi:10.2196/37291), 2022-07-06
Supplement: formative_v6i7e37291_app8.pdf [file formative_v6i7e37291_app8.pdf]

## Multimedia Appendix 8: Issues with Recommended Solutions from App Improvement Team

| No.     | ISSUE                                                                                                  | RECOMMENDATION                                                                                                           |
|---------|--------------------------------------------------------------------------------------------------------|--------------------------------------------------------------------------------------------------------------------------|
| Phase 1 |                                                                                                        |                                                                                                                          |
| 1.1     | NFC: Does not have outlet; not enough power                                                            | Provide a power plug with a USB connector                                                                                |
| 1.2     | NFC: Scale too small, unstable to stand on. Difficult to bend over to tap card on the machine          | Create an extension device with tongs to hold the card so do not have to bend over                                       |
| 1.3     | NFC: Lacks data display and alert indicating that the device is ready to use                           | Instruct user to wait until green light appears, and wait 5 seconds before standing on machine and tapping card          |
| 1.4     | APP: Different types of data on same graph with the same scale making it hard to read                  | Displays each type of data on different graphs                                                                           |
| 1.5     | APP: No BMI and dialysate volume interpretation                                                        | Add BMI and dialysate volume interpretation                                                                              |
| 1.6     | APP: Can't use in iOS system                                                                           | Make an app in iOS system                                                                                                |
| 1.7     | APP: Display every cycle as cycle 1                                                                    | Send results as total daily ultrafiltration volume                                                                       |
| Phase 2 |                                                                                                        |                                                                                                                          |
| 2.1     | NFC: scale too small and unstable. Cannot stand on it safely. Hard to use extension device to tap card | Make larger and add a handle.                                                                                            |
| 2.2     | APP: Scale on graph incorrect, shows different types of data in the same graph                         | Display each type of data in different graphs                                                                            |
| 2.3     | APP: no comparison between BW and DW; no dialysate volume interpretation                               | Determine criteria or BW (compare to DW) and dialysate volume interpretation                                             |
| 2.4     | APP: no previous data for BW, BMI and fluid intake displayed on the main page                          | Display previous data for BW, BMI and fluid intake on the main page                                                      |
| 2.5     | APP: dialysis cycles ending after midnight are counted in the next day                                 | Send results as total daily ultrafiltration volume                                                                       |
| 2.6     | TCC: data not uploading to TCC properly e.g. combined and split CAPD cycles                            | Send results as total daily ultrafiltration volume                                                                       |
| 2.7     | TCC: No alert on display for PD staff                                                                  | Activate the alert system in Thai Care Cloud via LINE or SMS                                                             |
| Phase 3 |                                                                                                        |                                                                                                                          |
| 3.1     | APP: Opens slowly, especially BW and UF icons                                                          | Improve app so opens faster -Close unused apps                                                                           |
| 3.2     | APP: Freezes often - must close and reopen it                                                          | Make the app more stable                                                                                                 |
| 3.3     | APP: Logs off by itself                                                                                | Make the app more stable                                                                                                 |
| 3.4     | APP: Interpretation of BMI and BW confusing                                                            | Use Thai so do not confuse with English words for weight and BMI                                                         |
| 3.5     | APP: Must record height every time for BMI                                                             | Automatically enter height recorded during registration                                                                  |
| 3.6     | APP: Not adding dialysate exchange times automatically                                                 | Automatically use the time when dialysate has finished draining into the field when dialysate starts to enter as default |
| 3.7     | APP: Confusing results of dialysate volume                                                             | Suggest using different words that are less confusing for net amount of fluid removed                                    |
| 3.8     | APP: No 'Pop-up' to inform that data has been sent or recorded                                         | Add 'Pop-up' to inform that data already sent or recorded                                                                |
| 3.9     | APP: Can't add in data if forgot                                                                       | Create way to fill in previous data                                                                                      |
| 3.10    | APP: Default time stamp as time of data entry rather than actual time of cycle                         | Set time of data entry as default, but allow it to be changed to actual time of cycle                                    |

APP: CKD-PD app

TCC: Thai Care Cloud

BMI: Body Mass Index

NFC: Near Field Communication

BW: Body weight

DW: Dry weight (after dialysis)
